# Supplementary material
Source: publisher site journal article supplement (https://www.dovepress.com/article/436419)
Supplement: Supplementary file 1 [file get_supplementary_file.php]

Table S1. Construct and items of the COEN Scale

| Construct | Items |
| --- | --- |
| Community Physical Environment | N=9 |
| Item 1 | How is the air quality in your community? |
| Item 2 | How is the sanitary condition of the public areas in your community? |
| Item 3 | How is the level of light pollution in your community? |
| Item 4 | How safe is the building environment in your community? |
| Item 5 | How is the road safety in your community? |
| Item 6 | How is the security system in your community? |
| Item 7 | How is the availability of public facilities in your community? |
| Item 8 | How is the convenience of transportation in your community? |
| Item 9 | How do you consider the overall habitability in your community? |
| Behavioral Risk Factors | N=11 |
| Item 10 | How easy is it for you to buy tobacco products in your community? |
| Item 11 | How is the regulation for public area smoking in your community? |
| Item 12 | How prevalent is tobacco use in your community? |
| Item 13 | How severe is the second-hand smoking issue in your community? |
| Item 14 | How active are people in your community in terms of exercise/physical activities? |
| Item 15 | How often do you engage in physical activities with people in your community? |
| Item 16 | How is the food safety in your community? |
| Item 17 | How accessible are fresh fruits and vegetables in your community? |
| Item 18 | How are the residents’ attitude towards pursuing healthy life in your community? |
| Item 19 | How healthy are residents’ behavior in general in your community? |
| Item 20 | How are residents’ abilities to access and apply health knowledge in your community? |
| Mental Health and Social Relationships | N=6 |
| Item 21 | How prevalent are mental health issues (e.g., depression, anxiety) in your community? |
| Item 22 | How is residents’ happiness in your community? |
| Item 23 | How is the sufficiency of mental health resources in your community? |
| Item 24 | How many friends do you have in your community? |
| Item 25 | How much do you trust other people in your community? |
| Item 26 | How often do residents interact with each other in your community? |
| Community Health Management | N=5 |
| Item 27 | How is the public health service regarding hypertension in your community? |
| Item 28 | How is the public health service regarding diabetes in your community? |
| Item 29 | How sufficient are the health services provided by your community? |
| Item 30 | How is the quality of health services provided by your community? |
| Item 31 | How do you think of the price of health services in your community? |
| Community Organizations and Activities | N=7 |
| Item 32 | How much does your community administration value residents’ involvement? |
| Item 33 | How abundant are the resident organizations in your community? |
| Item 34 | How often do residents participant in those organizations? |
| Item 35 | How is the abundancy and frequency of activities in your community? |
| Item 36 | How well are those community activities organized and managed? |
| Item 37 | How helpful are those community activities for residents? |
| Item 38 | How involved were the residents in community activities in the past year? |
